# Supplementary material
Source: PubMed Central journal article supplement (PMC3033273)
Supplement: 1019293108_pnas.201019293SI.pdf [file 1019293108_pnas.201019293SI.pdf]

# Supporting Information

Zha et al. 10.1073/pnas.1019293108

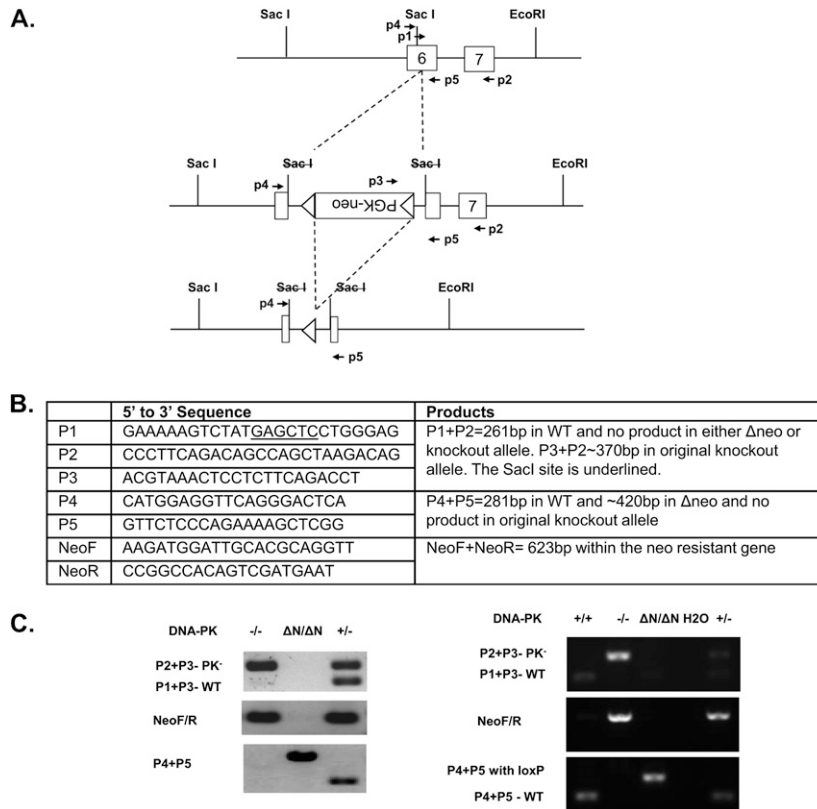

Fig. S1. (Continued)

**D. DNA-PKcs WT Exon 6 sequence**

```

Protein   T V L E K V Y E L L G V L G E V H P S
mRNA     GATACAGTTTTAGAAAAAGTCTATGAGCTCTGGGAGTATTAGGTGAAGTTCATCCTAGT
                SacI site

Protein   E M I N H S E N L F R A F L G E L K T Q
mRNA     GAGATGATAAACCATTCAGAAAACCTGTTCCGAGCTTTTCTGGGAGAACTTAAGACCCAG

Protein   M
mRNA     ATG
    
```

**DNA-PKcs<sup>Δneo</sup> Exon 6 sequence**

```

+2 Frame  S F R K S L C R G T # # L R I A Y I I
+1 Frame  Q F @ K K S M S R D L I T S Y S I H Y T
Protein   T V L E K V Y V E G P N N F V @ H T L Y
mRNA     GATACAGTTTTAGAAAAAGTCTATGTCGAGGGACCTAATAACTTCGTATAGCATACATTATAC
                LoxP site

+2 Frame  R S Y I K G Y & I & S E L A A V E I P A A
+1 Frame  K L Y # G L L N M I G I S G G R N S C S P
Protein   E V I L R V I E Y D R N @ R R S K F L Q P
mRNA     GAAGTTATATTAAGGGTTATTGAATATGATCGGAATTAGCGGCGGTCGAAATTCCTGCAGCCC

+2 Frame  R G I H @ F @ S G R H R G G A P G S I R &
+1 Frame  D P L V L E R P P P R W S S W E Y @ V K F
Protein   G G S T S S R A A A T A V E L L G V L G E
mRNA     GGGGGATCCACTAGTCTAGAGCGGCCGCCACCGCGGTGGAGCTCCTGGGAGTATTAGGTGAA

+2 Frame  S S S @ & D D K P F R K P V P S F S G R T
+1 Frame  I L V R & # T I Q K T C S E L F W E N L R
Protein   V H P S E M I N H S E N L F R A F L G E L
mRNA     GTTCATCCTAGTGAGATGATAAACCATTCAGAAAACCTGTTCCGAGCTTTTCTGGGAGAACT

+2 Frame  # D P D
+1 Frame  P R &
Protein   K T Q
mRNA     AAGACCCAGATG
    
```

**E.**

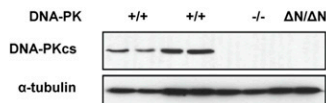

**Fig. S1.** Analyses of the DNA-PK catalytic subunit<sup>ΔNeo</sup> (PKcs) allele. (A) Schematic presentation of the WT DNA-PKcs locus, initial DNA-PKcs–targeted allele, and deleted-neo allele. Exon 6 and exon 7 of murine DNA-PKcs, the SacI site at which the loxp-pGK-neo-loxp was introduced, and all of the primers used in the analyses were diagrammed. (B) The list of primers used in the analyses. The SacI site within P1 at exon 6 of the WT DNA-PKcs allele is underlined. NeoF and NeoR are both located within the phosphoglycerate kinase (pGK)-Neo cassette. (C) The results of two representative PCR analyses of WT, DNA-PK<sup>-/-</sup>, and DNA-PKcs<sup>Δneo/Δneo</sup> cells. (D) The sequence of the WT (*Upper*) and DNA-PKcs<sup>Δneo</sup> (*Lower*) allele at the exon 6 region. The back/gray underline indicates the original exon 6 sequence. The black and bold area in *Lower* represents the sequence inserted into exon 6 of the DNA-PKcs<sup>Δneo</sup> allele. The blue underline indicates the residual loxP site after Cre recombination. The SacI site is marked in red in the WT sequence. The protein sequence encoded by this region is marked above the mRNA sequence (as protein). In the case of the DNA-PKcs<sup>Δneo</sup> allele, the two other possible translational frames (+1 and +2 frame) are also marked. Translational termination signals (@, TAG; #, TAA; &, TGA) are in red in *Lower*. (E) Western blot for total DNA-PKcs protein in DNA-PK<sup>+/+</sup>, <sup>-/-</sup>, or <sup>Δneo/Δneo</sup> ES cells. Antibodies are from EMD (anti-α-tubulin) and Thermo Scientific (Ab-4, anti-DNA-PKcs).

| JH290 Coding Join Substrate | Amp <sup>r</sup>                     | Cam <sup>r</sup> &Amp <sup>r</sup> | Cam/Amp | Relative Level |        |
|-----------------------------|--------------------------------------|------------------------------------|---------|----------------|--------|
| Exp1                        | WT(TC1)                              | 39400                              | 450     | 1.14%          |        |
|                             | DNA-PK <sup>-/-</sup>                | 22100                              | 10      | 0.05%          | 0.04   |
|                             | DNA-PK <sup>Δneo/Δneo</sup>          | 28500                              | 7       | 0.02%          | 0.02   |
|                             | XRCC4 <sup>-/-</sup>                 | 6500                               | 1       | 0.02%          | 0.01   |
| Exp2                        | WT(TC1)                              | 5500                               | 39      | 0.71%          |        |
|                             | DNA-PK <sup>-/-</sup>                | 4800                               | 2       | 0.04%          | 0.06   |
|                             | DNA-PK <sup>Δneo/Δneo</sup>          | 6800                               | 2       | 0.03%          | 0.04   |
|                             | DNA-PK <sup>Δneo/Δneo</sup> (no Rag) | 7100                               | 0       | 0.00%          | <0.002 |
| Exp3                        | WT(TC1)                              | 12300                              | 124     | 1.01%          |        |
|                             | DNA-PK <sup>-/-</sup>                | 9800                               | 6       | 0.06%          | 0.06   |
|                             | DNA-PK <sup>Δneo/Δneo</sup>          | 5600                               | 4       | 0.07%          | 0.07   |
|                             | XRCC4 <sup>-/-</sup>                 | 2800                               | 0       | 0.00%          | <0.010 |

**Fig. S2.** DNA-PKcs<sup>Δneo/Δneo</sup> ES cells are impaired for extrachromosomal coding join formation. The results of extrachromosomal variable (diversity) joining [V (D)J] recombination analyses using coding join substrate (JH290) in WT, DNA-PK<sup>-/-</sup>, DNA-PKcs<sup>Δneo/Δneo</sup>, and control XRCC4<sup>-/-</sup> ES cells.

|       |                                            | ATMi | Amp <sup>r</sup> | Cam <sup>r</sup> &Amp <sup>r</sup> | Cam/Amp | Relative Level |
|-------|--------------------------------------------|------|------------------|------------------------------------|---------|----------------|
| Exp1  | WT(TC1)                                    | -    | 45000            | 563                                | 1.25%   |                |
|       | DNA-PK <sup>ΔN/ΔN</sup>                    | -    | 14000            | 173                                | 1.24%   | 0.99           |
|       | DNA-PK <sup>ΔN/ΔN</sup>                    | +    | 131000           | 126                                | 0.10%   | 0.08           |
|       | DNA-PK <sup>ΔN/ΔN</sup> (no Rag)           | -    | 66000            | 0                                  | 0.00%   | <0.001         |
|       | XRCC4 <sup>-/-</sup>                       | -    | 6500             | 1                                  | 0.02%   | 0.01           |
| Exp2  | WT(TC1)                                    | -    | 123000           | 725                                | 0.59%   |                |
|       | WT(TC1)                                    | +    | 50000            | 622                                | 1.24%   | 2.11           |
|       | DNA-PK <sup>ΔN/ΔN</sup>                    | -    | 69000            | 331                                | 0.48%   | 0.82           |
|       | DNA-PK <sup>ΔN/ΔN</sup>                    | +    | 124000           | 103                                | 0.08%   | 0.14           |
|       | DNA-PK <sup>ΔN/ΔN</sup> ATM <sup>-/-</sup> | -    | 69000            | 47                                 | 0.07%   | 0.12           |
|       | DNA-PK <sup>ΔN/ΔN</sup> (no Rag)           | -    | 121000           | 0                                  | 0.00%   | <0.014         |
| Exp3  | WT(TC1)                                    | -    | 21000            | 258                                | 1.23%   |                |
|       | WT(TC1)                                    | +    | 25000            | 485                                | 1.94%   | 1.58           |
|       | DNA-PK <sup>ΔN/ΔN</sup>                    | -    | 17000            | 47                                 | 0.28%   | 0.23           |
|       | DNA-PK <sup>ΔN/ΔN</sup>                    | +    | 11000            | 10                                 | 0.09%   | 0.07           |
|       | DNA-PK <sup>ΔN/ΔN</sup> ATM <sup>-/-</sup> | -    | 9000             | 3                                  | 0.03%   | 0.03           |
|       | DNA-PK <sup>ΔN/ΔN</sup> (no Rag)           | -    | 7000             | 1                                  | 0.01%   | <0.011         |
| Exp 4 | WT(TC1)                                    | -    | 3700             | 40                                 | 1.08%   |                |
|       | ATM <sup>-/-</sup>                         | -    | 6400             | 68                                 | 1.06%   | 0.98           |
|       | DNA-PK <sup>ΔN/ΔN</sup>                    | -    | 4900             | 28                                 | 0.57%   | 0.53           |
|       | DNA-PK <sup>ΔN/ΔN</sup> ATM <sup>-/-</sup> | -    | 3800             | 4                                  | 0.11%   | 0.10           |
|       | XRCC4 <sup>-/-</sup>                       | -    | 3900             | 0                                  | 0.00%   | <0.024         |
| Exp 5 | WT(TC1)                                    | -    | 2400             | 20                                 | 0.83%   |                |
|       | ATM <sup>-/-</sup>                         | -    | 2200             | 19                                 | 0.86%   | 1.04           |
|       | DNA-PK <sup>ΔN/ΔN</sup>                    | -    | 2800             | 27                                 | 0.96%   | 1.16           |
|       | DNA-PK <sup>ΔN/ΔN</sup> ATM <sup>-/-</sup> | -    | 4400             | 4                                  | 0.09%   | 0.11           |
|       | XRCC4 <sup>-/-</sup>                       | -    | 2900             | 1                                  | 0.03%   | 0.04           |
| Exp 6 | WT(TC1)                                    | -    | 2400             | 44                                 | 1.83%   |                |
|       | WT(TC1)                                    | +    | 2100             | 35                                 | 1.67%   | 0.91           |
|       | ATM <sup>-/-</sup>                         | -    | 3300             | 46                                 | 1.39%   | 0.76           |
|       | DNA-PK <sup>ΔN/ΔN</sup>                    | -    | 4500             | 64                                 | 1.42%   | 0.78           |
|       | DNA-PK <sup>ΔN/ΔN</sup>                    | +    | 2600             | 6                                  | 0.23%   | 0.13           |
|       | XRCC4 <sup>-/-</sup>                       | -    | 3900             | 1                                  | 0.03%   | 0.01           |

**Fig. S3.** Ataxia telangiectasia-mutated (ATM) kinase promotes efficient extrachromosomal SJ formation in DNA-PKcs-deficient ES cells. The result of extrachromosomal V(D)J analyses with a signal join substrate (JH200) in WT, ATM<sup>-/-</sup>, DNA-PKcs<sup>Δneo/Δneo</sup> (with or without ATM inhibitor), DNA-PKcs<sup>Δneo/Δneo</sup>ATM<sup>-/-</sup>, and control XRCC4<sup>-/-</sup> ES cells.

| Genotypes                                      | Left RSignaling Flank              | Right Signaling Flank                         | #  | Del bp |
|------------------------------------------------|------------------------------------|-----------------------------------------------|----|--------|
| <b>Precise Junction</b>                        | <u>TGTTTTTGTTCAGTCTGTAGCACTGTG</u> | <u>CACAGTGGTAGTACTCCACTGCTGGCTGTACAAAAACC</u> |    |        |
| <b>DNA-PK<sup>ΔN/ΔN</sup></b>                  | TGTTTTTGTTCAGTCTGTAGCACTGTG        | CACAGTGGTAGTACTCCACTGCTGGCTGTACAAAAACC        | 13 | 0      |
|                                                | TGTTTTTGTTCAGTCTGTAGCACTGT         | CACAGTGGTAGTACTCCACTGCTGGCTGTACAAAAACC        | 1  | 1      |
| <b>DNA-PK<sup>ΔN/ΔN</sup>, ATMi</b>            | TGTTTTTGTTCAGTCTGTAGCACTGTG        | CACAGTGGTAGTACTCCACTGCTGGCTGTACAAAAACC        | 8  | 0      |
|                                                | TGTTTTTGTTCAGTCTGTAGCAC            | CACAGTGGTAGTACTCCACTGCTGGCTGTACAAAAACC        | 1  | 4      |
|                                                | TGTTTTTGTTCAGTCT                   | AGTGGTAGTACTCCACTGCTGGCTGTACAAAAACC           | 2  | 14     |
|                                                | TGTTTTTGTTCAGT                     | GTAGTACTCCACTGCTGGCTGTACAAAAACC               | 1  | 20     |
| <b>DNA-PK<sup>ΔN/ΔN</sup>ATM<sup>-/-</sup></b> | TGTTTTTGTTCAGTCTGTAGCACTGTG        | CACAGTGGTAGTACTCCACTGCTGGCTGTACAAAAACC        | 9  | 0      |
|                                                | TGTTTTTGTTCAGTCTGTAGCACTGTG        | AGTGGTAGTACTCCACTGCTGGCTGTACAAAAACC           | 1  | 3      |
|                                                | TGTTTTTGTTCAGTCTGTAGCACTG          | CACAGTGGTAGTACTCCACTGCTGGCTGTACAAAAACC        | 1  | 2      |
|                                                | TGTTTTTGTTCAGTCTGTAGCACT           | ACAGTGGTAGTACTCCACTGCTGGCTGTACAAAAACC         | 2  | 4      |
|                                                | TGTTTTTGTTCAGTCTGTAGCA             | AGTGGTAGTACTCCACTGCTGGCTGTACAAAAACC           | 1  | 8      |
|                                                | TGTTTTTGTTCAGTCTGTAGC              | GTACTCCACTGCTGGCTGTACAAAAACC                  | 1  | 16     |
|                                                | TGTTTTTGTTCAGTCTGTAG               | ACTCCACTGCTGGCTGTACAAAAACC                    | 1  | 19     |
|                                                | TGTTTTTGTTCAGTCT                   | GTACAAAAACC                                   | 1  | 41     |
|                                                | TGTTTTT                            | AAAAACC                                       | 1  | 55     |

**Fig. S4.** Sequence analysis of extrachromosomal V(D)J signal joints from DNA-PKcs<sup>Δneo/Δneo</sup> (with or without ATM inhibitor) and DNA-PKcs<sup>Δneo/Δneo</sup>ATM<sup>-/-</sup> ES cells. The number of base pairs deleted at each junction is marked on the right most column. The number in the # column indicates the number of clones sequenced that represented the given sequence.

| Genotypes #                                   | Left                       | N  | Right                                   | Del.bp |
|-----------------------------------------------|----------------------------|----|-----------------------------------------|--------|
| <b>GL</b>                                     | GGTTTTGTCCAGTCTGTAGCACTGTG |    | CACAGTGGTAGTACTCCACTGTCTGGCTGTACAAAAACC |        |
| <b>DNA-PK<sup>-/-</sup> ATM<sup>C/C</sup></b> |                            |    |                                         |        |
| 28                                            | GGTTTTGTCCAGTCTGTAGCACTGTG |    | CACAGTGGTAGTACTCCACTGTCTGGCTGTACAAAAACC | 0      |
| 1                                             | GGTTTTGTCCAGTCTGTAGCACTGTG | G  | CACAGTGGTAGTACTCCACTGTCTGGCTGTACAAAAACC | 0      |
| 1                                             | GGTTTTGTCCAGTCTGTAGCACTGTG | A  | CACAGTGGTAGTACTCCACTGTCTGGCTGTACAAAAACC | 0      |
| 1                                             | GGTTTTGTCCAGTCTGTAGCACTGTG | CG | CACAGTGGTAGTACTCCACTGTCTGGCTGTACAAAAACC | 0      |
| 1                                             | GGTTTTGTCCAGTCTGTAGCACTGTG | GG | CACAGTGGTAGTACTCCACTGTCTGGCTGTACAAAAACC | 0      |
| 1                                             | GGTTTTGTCCAGTCTGTAGCACTGTG | GC | CACAGTGGTAGTACTCCACTGTCTGGCTGTACAAAAACC | 0      |
| 1                                             | GGTTTTGTCCAGTCTGTAGCACTGTG | AC | CACAGTGGTAGTACTCCACTGTCTGGCTGTACAAAAACC | 0      |
| 1                                             | GGTTTTGTCCAGTCTGTAGCACTGTG |    | ACAGTGGTAGTACTCCACTGTCTGGCTGTACAAAAACC  | 1      |
| 1                                             | GGTTTTGTCCAGTCTGTAGCACTGT  | G  | CAGTGGTAGTACTCCACTGTCTGGCTGTACAAAAACC   | 2      |
| <b>DNA-PK<sup>-/-</sup> ATM<sup>-/-</sup></b> |                            |    |                                         |        |
| 29                                            | GGTTTTGTCCAGTCTGTAGCACTGTG |    | CACAGTGGTAGTACTCCACTGTCTGGCTGTACAAAAACC | 0      |
| 1                                             | GGTTTTGTCCAGTCTGTAGCACTGTG | TT | CACAGTGGTAGTACTCCACTGTCTGGCTGTACAAAAACC | 0      |
| 1                                             | GGTTTTGTCCAGTCTGTAGCACTGTG | TA | CACAGTGGTAGTACTCCACTGTCTGGCTGTACAAAAACC | 0      |
| 1                                             | GGTTTTGTCCAGTCTGTAGCACTGTG | G  | CACAGTGGTAGTACTCCACTGTCTGGCTGTACAAAAACC | 0      |
| 1                                             | GGTTTTGTCCAGTCTGTAGCACTGT  | A  | ACAGTGGTAGTACTCCACTGTCTGGCTGTACAAAAACC  | 2      |
| 2                                             | GGTTTTGTCCAGTCTGTAGCACTGT  | T  | CAGTGGTAGTACTCCACTGTCTGGCTGTACAAAAACC   | 3      |
| 1                                             | GGTTTTGTCCAGTCTGTAGCACTG   |    | CAGTGGTAGTACTCCACTGTCTGGCTGTACAAAAACC   | 4      |
| 1                                             | GGTTTTGTCCAGTCTGTAG        | A  | ACAGTGGTAGTACTCCACTGTCTGGCTGTACAAAAACC  | 8      |
| 1                                             | GGTTTTGTCCAGTCTGTAGCACTGT  | C  | AGTACTCCACTGTCTGGCTGTACAAAAACC          | 9      |
| 1                                             | GGTTTTGTCCAGTCTGTAGC       | C  | GTGGTAGTACTCCACTGTCTGGCTGTACAAAAACC     | 10     |
| 1                                             | GGTTTTGTCCAGTCTG           |    | CCACTGTCTGGCTGTACAAAAACC                | 24     |

**Fig. S5.** Sequence analysis of chromosomal V(D)J signal joints from DNA-PKcs<sup>-/-</sup> ATM<sup>C/C</sup> and DNA-PKcs<sup>-/-</sup> ATM<sup>-/-</sup> v-abl transformed pro-B cells. The number of base pairs deleted at the junctions is marked in the Del bp column. The number in the # column indicates the number of clones sequenced that represented the given sequence.

| Genotypes                       | #                          | Left                       | N                                       | Right                                   | Del.bp |
|---------------------------------|----------------------------|----------------------------|-----------------------------------------|-----------------------------------------|--------|
| <b>GL</b>                       |                            | GGTTTTGTCCAGTCTGTAGCACTGTG |                                         | CACAGTGGTAGTACTCCACTGTCTGGCTGTACAAAAACC |        |
| <b>ATM<sup>-/-</sup></b>        |                            |                            |                                         |                                         |        |
| 15                              | GGTTTTGTCCAGTCTGTAGCACTGTG |                            | CACAGTGGTAGTACTCCACTGTCTGGCTGTACAAAAACC | 0                                       |        |
| 1                               | GGTTTTGTCCAGTCTGTAGCACTGTG | C                          | CACAGTGGTAGTACTCCACTGTCTGGCTGTACAAAAACC | 0                                       |        |
| <b>ATM<sup>-/-</sup>:NU7441</b> |                            |                            |                                         |                                         |        |
| 8                               | GGTTTTGTCCAGTCTGTAGCACTGTG |                            | CACAGTGGTAGTACTCCACTGTCTGGCTGTACAAAAACC | 0                                       |        |
| 1                               | GGTTTTGTCCAGTCTGTAGCACTGT  | T                          | ACAGTGGTAGTACTCCACTGTCTGGCTGTACAAAAACC  | 2                                       |        |
| 1                               | GGTTTTGTCCAGTCTGTAGCACTGT  |                            | CAGTGGTAGTACTCCACTGTCTGGCTGTACAAAAACC   | 3                                       |        |
| 1                               | GGTTTTGTCCAGTCTGTAGCAC     | C                          | AGTGGTAGTACTCCACTGTCTGGCTGTACAAAAACC    | 7                                       |        |
| 1                               | GGTTTTGTCCAGTCTGTA         |                            | AGTACTCCACTGTCTGGCTGTACAAAAACC          | 17                                      |        |

**Fig. S6.** Sequence analysis of chromosomal V(D)J signal joints from ATM<sup>-/-</sup> v-abl transformed pro-B cells with or without DNA-PKcs inhibitor NU7441. The number of base pairs deleted at the junction is marked on the Del bp column. The number in the # column indicates the number of clones sequenced that represented the given sequence.

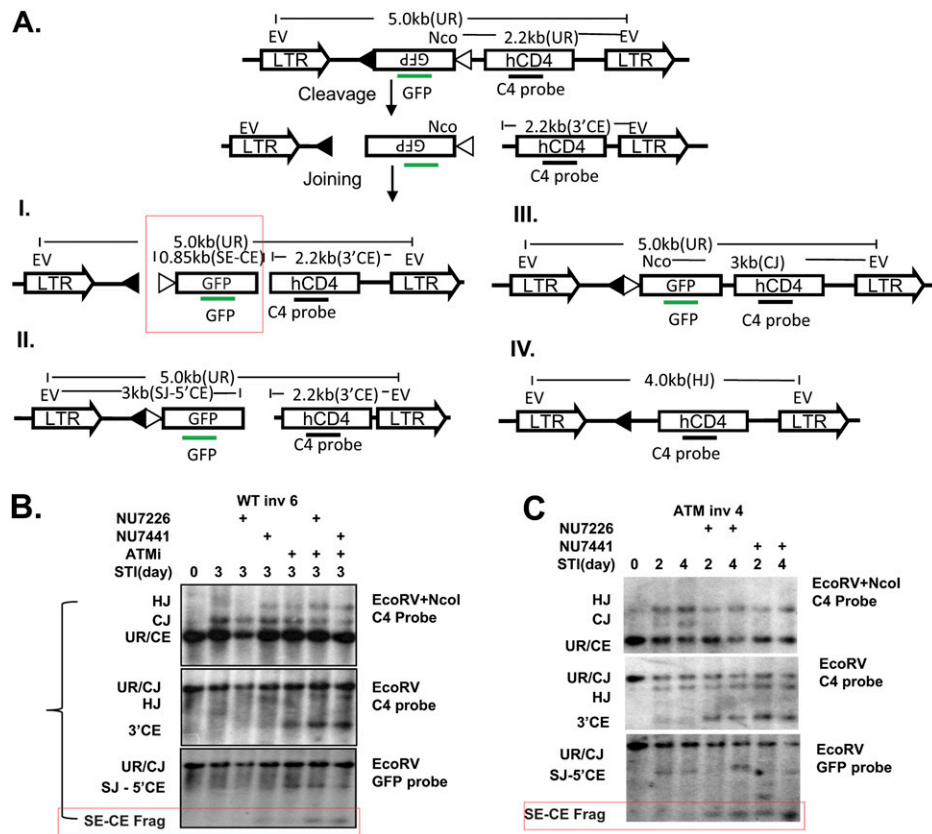

**Fig. S7.** DNA-PK kinase inhibitor reduced SJ formation during inversional V(D)J recombination in v-abl-transformed pro-B lines. (A) Diagram of the pMX-INV substrate used in chromosomal V(D)J recombination assays. The diagram is adapted from Bredemeyer et al. (1). The pMX-INV vector has a single pair of recombination signal sequences (RSs) flanking the inverted GFP cassette. The long terminal repeats (LTR), IRES-hCD4 cDNA (hCD4), 5' 12-recombination signal (12-RS), and 3' 23-RS (filled and open triangles, respectively), EcoRV (EV) site, NcoI (Nco) site, and C4 and GFP probes are indicated. Normal V(D)J recombination between the two RSs and successful formation of both signal joins (SJs) and coding joins (CJs) lead to inversion of the GFP cassette. Shown in this diagram is a schematic representation of unrearranged (UR) cleavage intermediates (second line), and four possible joining or partial joining products can be distinguished by Southern blotting (I-IV). I, both SJ and CJ fail to form. The GFP probe detects a 0.85-kb blunt 5'-phosphorylated RS ends (SE) and covalently sealed (hairpinned) coding ends (CE) fragment (red boxes in A-C) in EcoRV-digested DNA. A C4 probe detects the 2.2-kb 3'CE fragment in EcoRV-digested DNA. II, the SJ forms, but the CJ fails to form. The GFP probe detects a 0.3-SJ-5'CE fragment (B and C) in EcoRV-digested DNA. The C4 probe detects the 2.2-kb 3'CE fragment in EcoRV-digested DNA. III, normal rearrangement and formation of CJ. The C4 probe detects a 3-kb fragment in EcoRV+ NcoI digested DNA. IV, formation of hybrid join (HJ) and loss of the GFP fragment. The C4 probe detects a 4-kb band in EcoRV+NcoI-digested DNA and a 4-kb band in EcoRV-digested DNA. Summary of the results. The conversion from II to I is because of the loss of SJ formation (accumulation of SEs). In WT cells treated with both ATM and DNA-PKs inhibitors, we observed the accumulation of the 0.85-kb SE-CE fragments, indicating SJ defects (B). Similarly, in ATM-deficient cells treated with DNA-PKs inhibitor, we observed the accumulation of the 0.85-kb SE-CE fragments (C). These data indicate that DNA-PKs and ATM have overlapping roles in SJ formation during inverted V(D)J recombination.

1. Bredemeyer AL, et al. (2006) ATM stabilizes DNA double-strand-break complexes during V(D)J recombination. *Nature* 442:466-470.
